# Supplementary material
Source: publisher figshare collection journal article supplement (https://sage.figshare.com/ndownloader/files/13174886)

## ONLINE APPENDIX

Images used in the religious belief prime (Studies 1a, 2, 3, 4a, 4b, and 5).

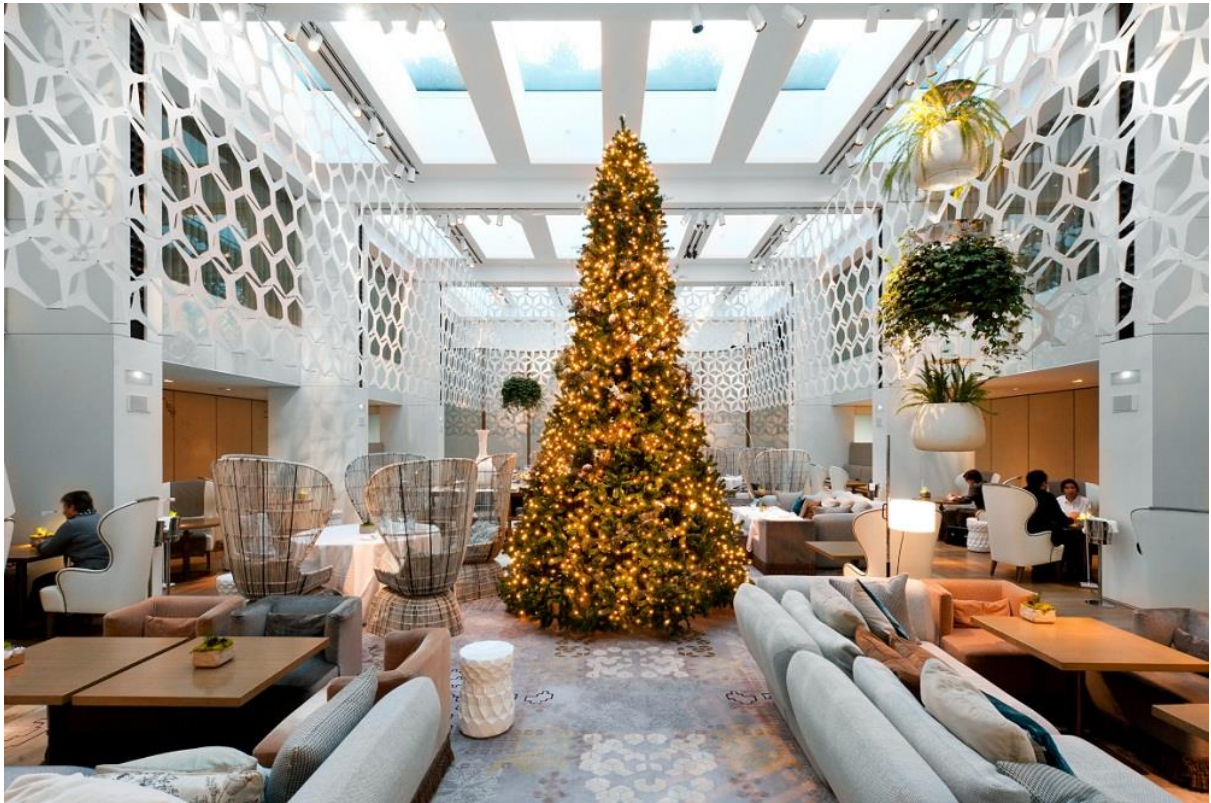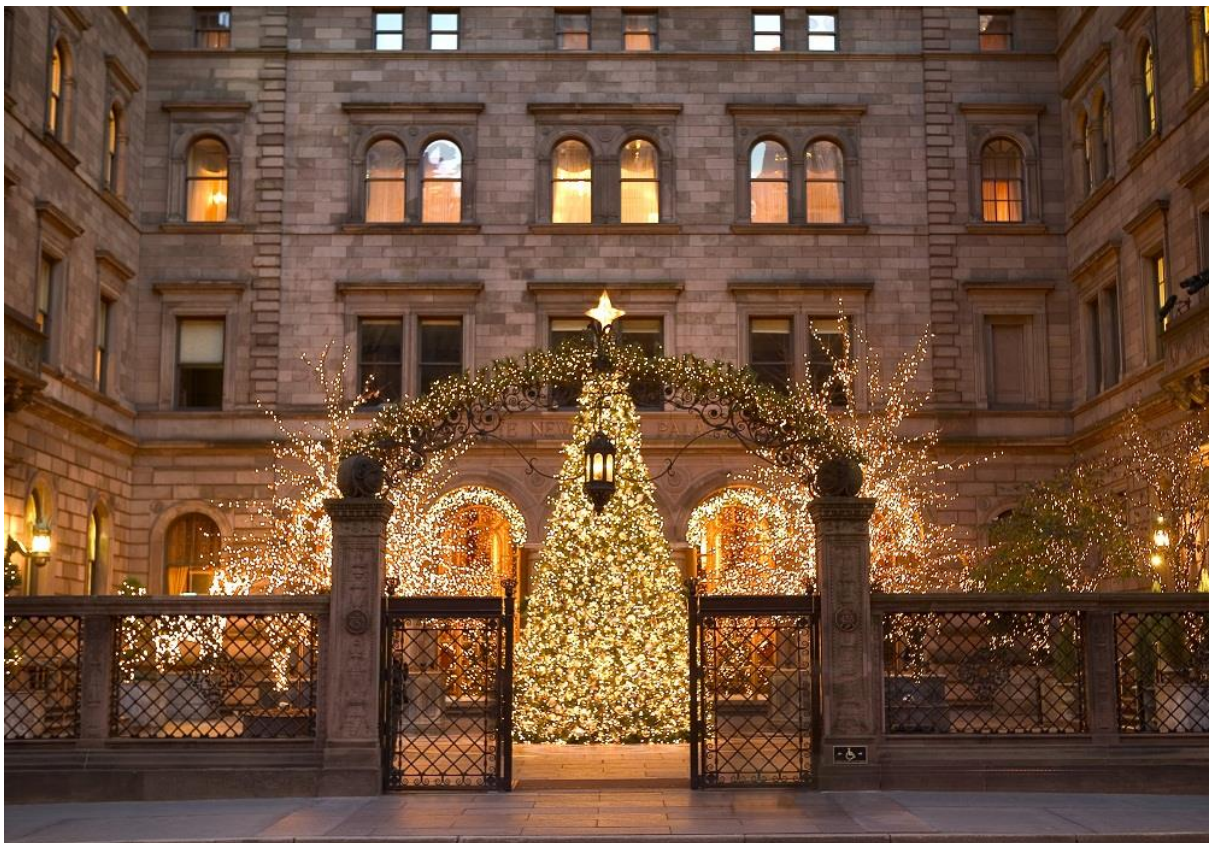

Images used in the neutral prime (Studies 1a, 2, 3, 4a, 4b, and 5).

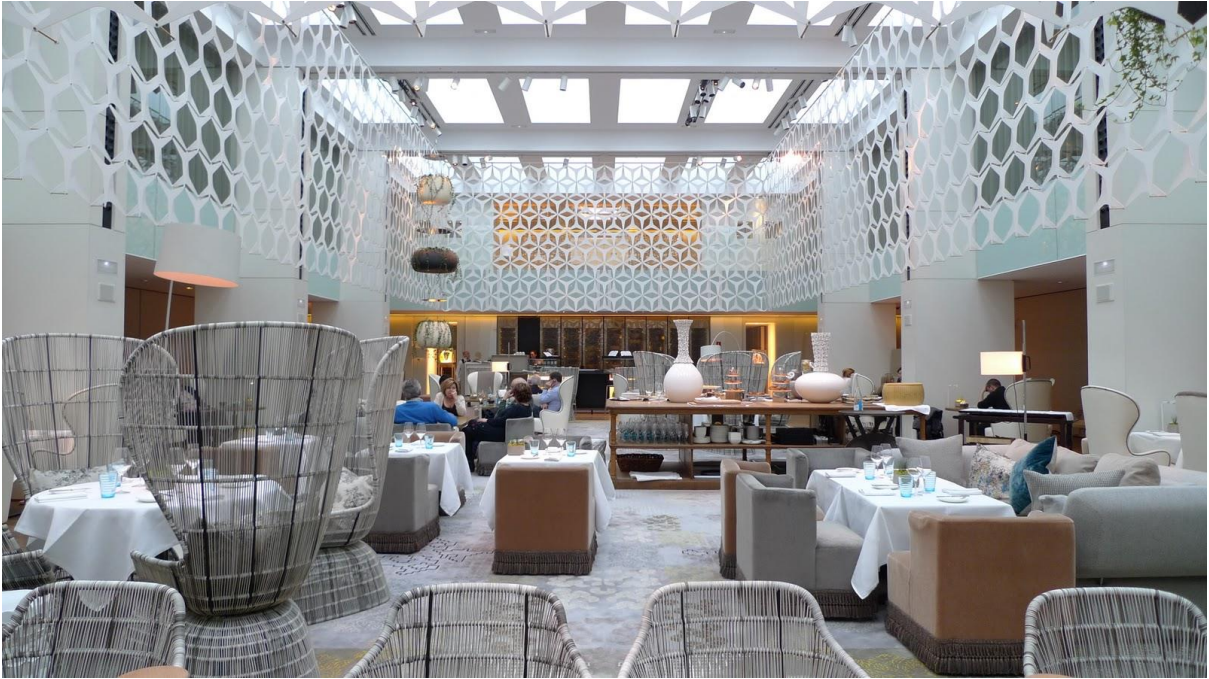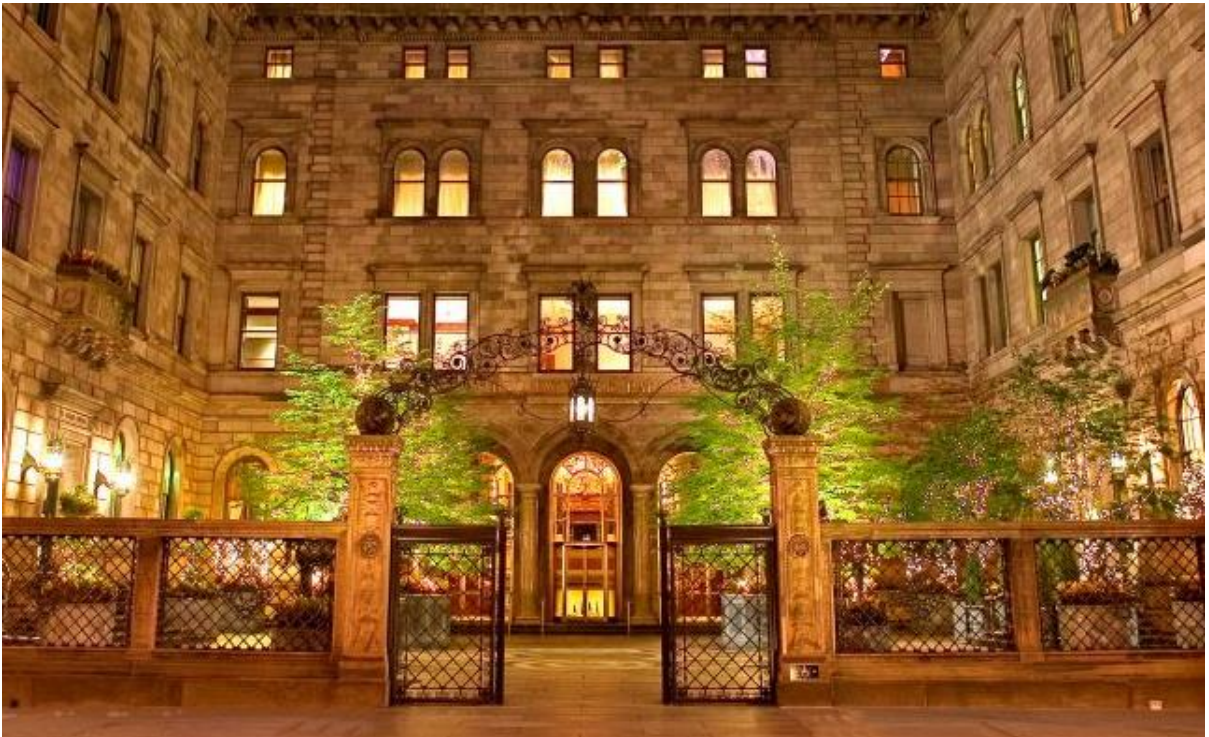

Images used in the festivity prime (Study 1a).

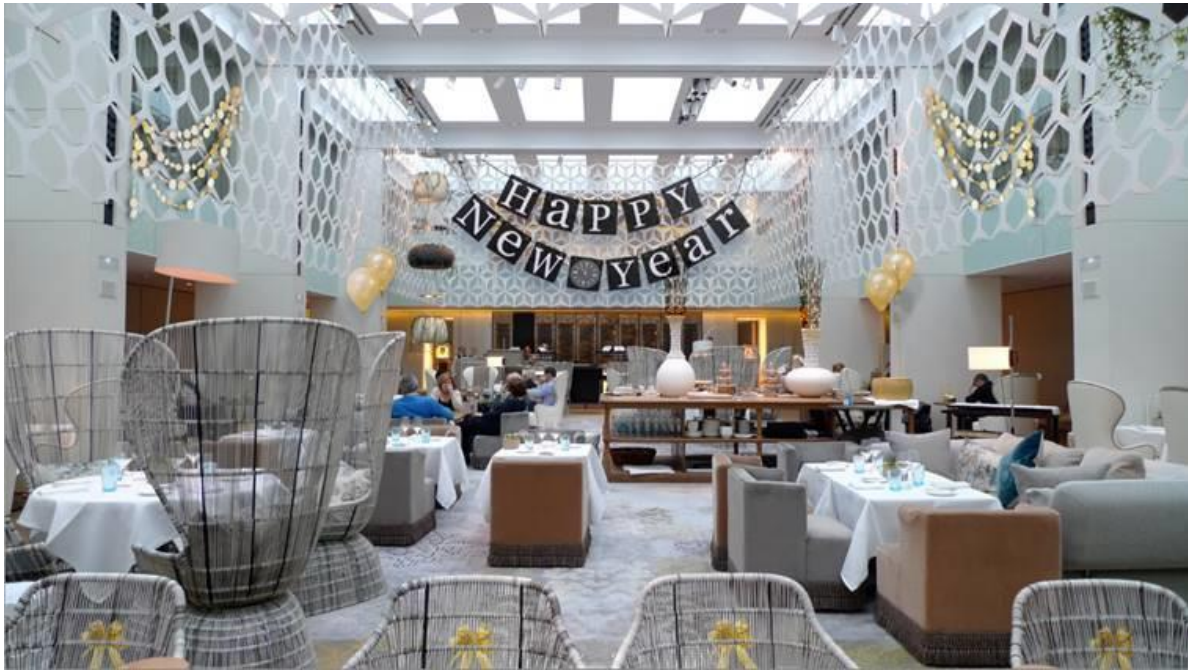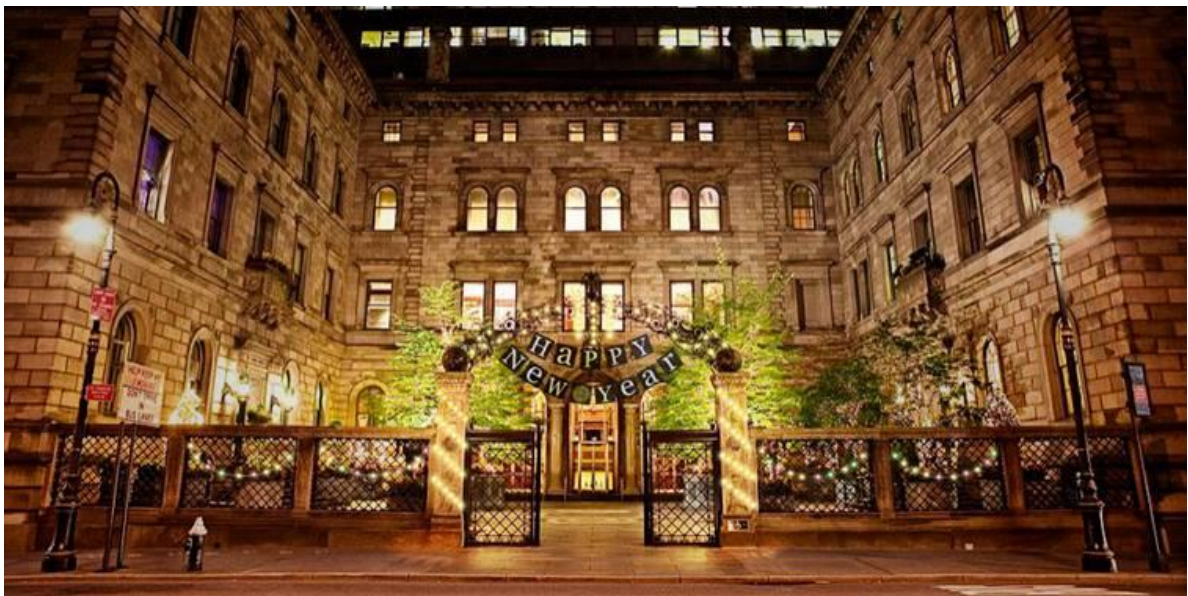

Supplement: Supplementary file 1 [file 13174886]
